# Supplementary material
Source: PubMed Central journal article supplement (PMC6504254)
Supplement: NIHMS1022626-supplement-Supp.pdf [file NIHMS1022626-supplement-Supp.pdf]

1           **Periarticular mesenchymal progenitors initiate and contribute to secondary**  
2           **ossification center formation during mouse long bone development**

3           Wei Tong<sup>\*,1,2</sup>, Robert J Tower<sup>\*,1</sup>, Chider Chen<sup>3</sup>, Luqiang Wang<sup>1</sup>, Leilei Zhong<sup>1</sup>, Yulong Wei<sup>1,2</sup>, Hao  
4           Sun<sup>1</sup>, Gaoyuan Cao<sup>4</sup>, Haoruo Jia<sup>1</sup>, Maurizio Pacifici<sup>5</sup>, Eiki Koyama<sup>5</sup>, Motomi Enomoto-Iwamoto<sup>6</sup>, and  
5           Ling Qin<sup>1,#</sup>

6           <sup>1</sup>Department of Orthopaedic Surgery, Perelman School of Medicine, University of Pennsylvania,  
7           Philadelphia, Pennsylvania, 19104, USA

8           <sup>2</sup>Department of Orthopaedics, Union Hospital, Tongji Medical College, Huazhong University of Science  
9           and Technology, Wuhan, Hubei, China

10          <sup>3</sup>Department of Anatomy and Cell Biology, School of Dental Medicine, University of Pennsylvania,  
11          Philadelphia, PA 19104, USA

12          <sup>4</sup>Rutgers Institute for Translational Medicine and Science, Rutgers University, New Brunswick, NJ 08901,  
13          USA.

14          <sup>5</sup>Translational Research Program in Pediatric Orthopaedics, Children's Hospital of Philadelphia,  
15          Philadelphia, Pennsylvania, 19104, USA

16          <sup>6</sup>Department of Orthopaedic Surgery, School of Medicine, University of Maryland, Baltimore, MD 21201,  
17          USA

18          \*These authors contributed equally to this article.

19          #Corresponding author: Ling Qin, Department of Orthopaedic Surgery, Perelman School of Medicine,  
20          University of Pennsylvania, G14A Stemmler Hall, 36<sup>th</sup> Street and Hamilton Walk, Philadelphia, PA  
21          19104, USA

22          Tel: 215-8986697; Fax: 215-5732133; email: qinling@pennmedicine.upenn.edu

23          **Running title:** Periarticular MSCs form the SOC

1 **Supplementary Figure**  
2 **Figure S1**

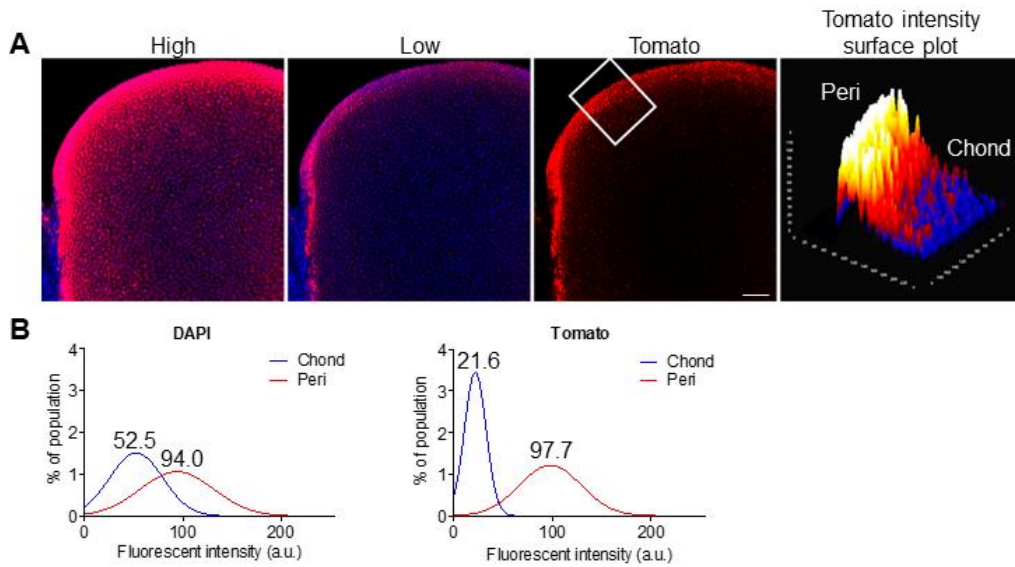

2  
3 **Figure S1 Periarticular cells show increased Tomato fluorescence compared to the underlying**  
4 **chondrocytes prior to SOC initiation.**

5 (A) Epiphyseal femurs were imaged for tomato fluorescence and a surface plot of Tomato fluorescence  
6 along the outer surface generated. Bar = 50  $\mu$ m. (B) Fluorescent intensity distribution of the periarticular  
7 region and underlying chondrocytes for DAPI and Tomato. Numbers indicate mean value of group.

## Figure S2

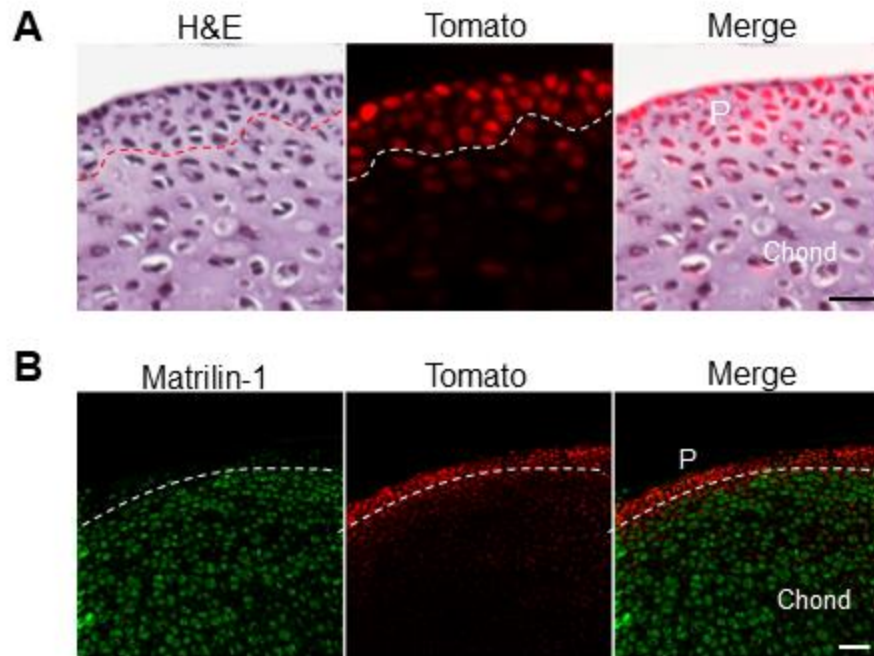

1

2 **Figure S2 Tomato<sup>H</sup> cells correspond with the periarticular region while Tomato<sup>L</sup> cells of the**  
3 **underlying chondrocytes are destined for removal during SOC formation.**

4 (A) Overlay between fluorescent and H&E stained images show that the Tomato<sup>H</sup> cells correspond with  
5 the outer layer of periarticular cells while the Tomato<sup>L</sup> cells represent the underlying chondrocytes. Dotted  
6 lines denote periarticular cell-epiphyseal chondrocyte boundary. Bar = 50  $\mu$ m. (B) Tomato<sup>H</sup> and Matrilin-  
7 1 cells segregate, suggesting Tomato<sup>H</sup> cells remain to form the articular cartilage while the Tomato<sup>L</sup> cells  
8 will be removed during epiphyseal marrow compartment formation. Dotted line denotes Tomato<sup>H</sup>-  
9 Matrilin-1<sup>+</sup> boundary. Bar = 100  $\mu$ m.

# Figure S3

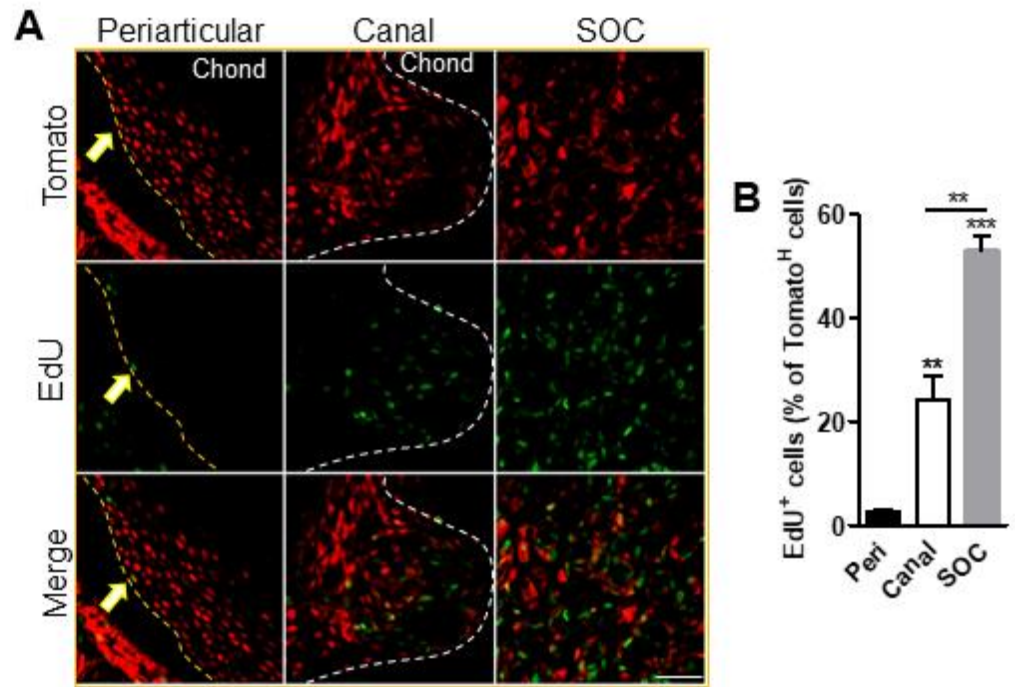

1

2 **Figure S3 Periarticular invasion during SOC canal progression is associated with increased cellular**  
3 **proliferation.**

4 (A) *Col2/Tomato* mice were injected with EdU then imaged by confocal microscopy in the periarticular  
5 region, invading canal or expanding SOC. Dotted lines denote the periarticular surface (yellow) and canal  
6 front (white), respectively. Yellow arrow points to periarticular surface. Bar = 50  $\mu$ m. (B) The percent of  
7 Tomato<sup>H</sup> cells staining positive for EdU were quantified. Graphs represent average values  $\pm$  SEM. Data  
8 analyzed by one-way ANOVA. (\* $p$ <0.05, \*\* $p$ <0.01) (n=6).

## Figure S4

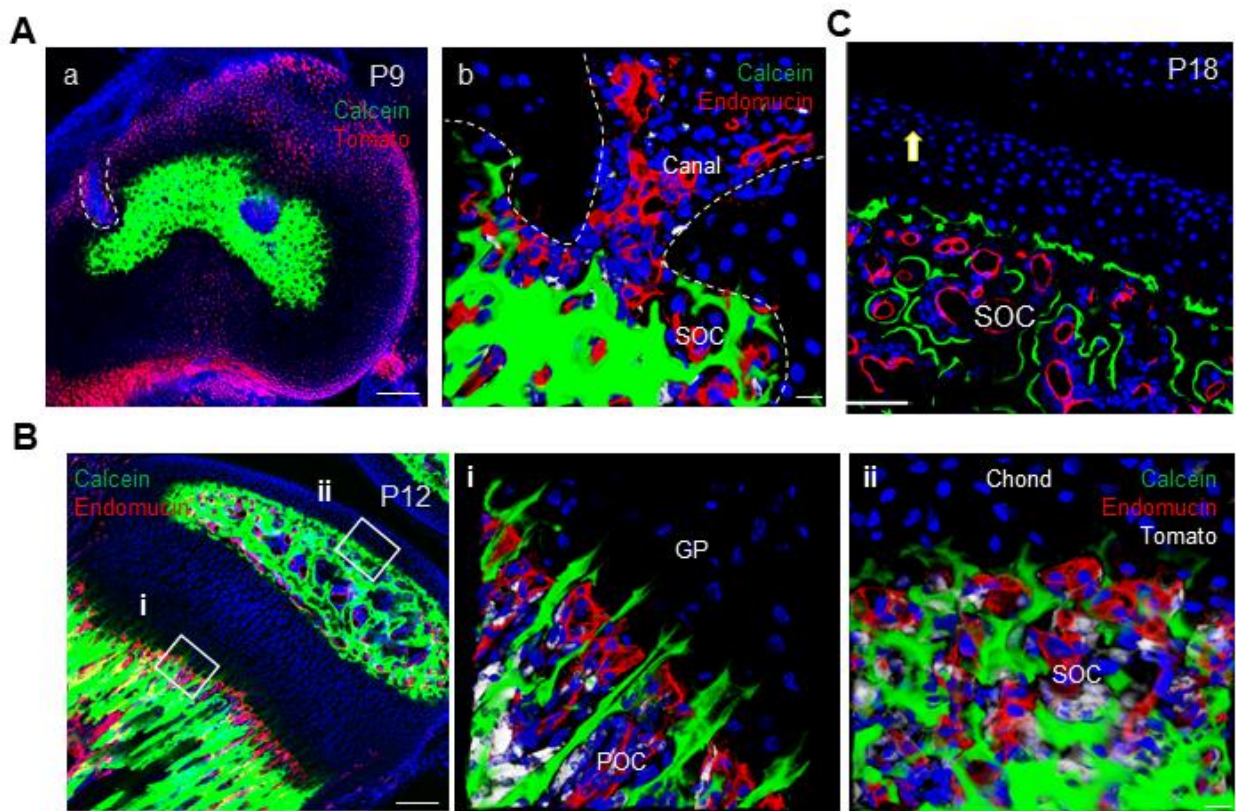

1

2 **Figure S4 Mineralization directs vessel-led outward SOC expansion, but not Tomato<sup>H</sup> driven canal**  
3 **invasion.**

4 (A) Calcein labeling shows intense mineralization occurring in the forming SOC, but not along the  
5 invading canal. Dotted white line shows canal and SOC structure. Bar = 200  $\mu\text{m}$  (a), 20  $\mu\text{m}$  (b). (B)

6 Calcein labeling shows mineralization between chondrocytes parallel to the direction of SOC expansion  
7 at and ahead of vessel invasion at P12, reminiscent of POC expansion. Bar = 200  $\mu\text{m}$ , 20  $\mu\text{m}$ . (C)

8 However, at the later stages of SOC maturation, mineralization seems transition to perpendicular, slowing  
9 SOC expansion and establishing articular cartilage boundaries around P18. Bar = 50  $\mu\text{m}$ .

# Figure S5

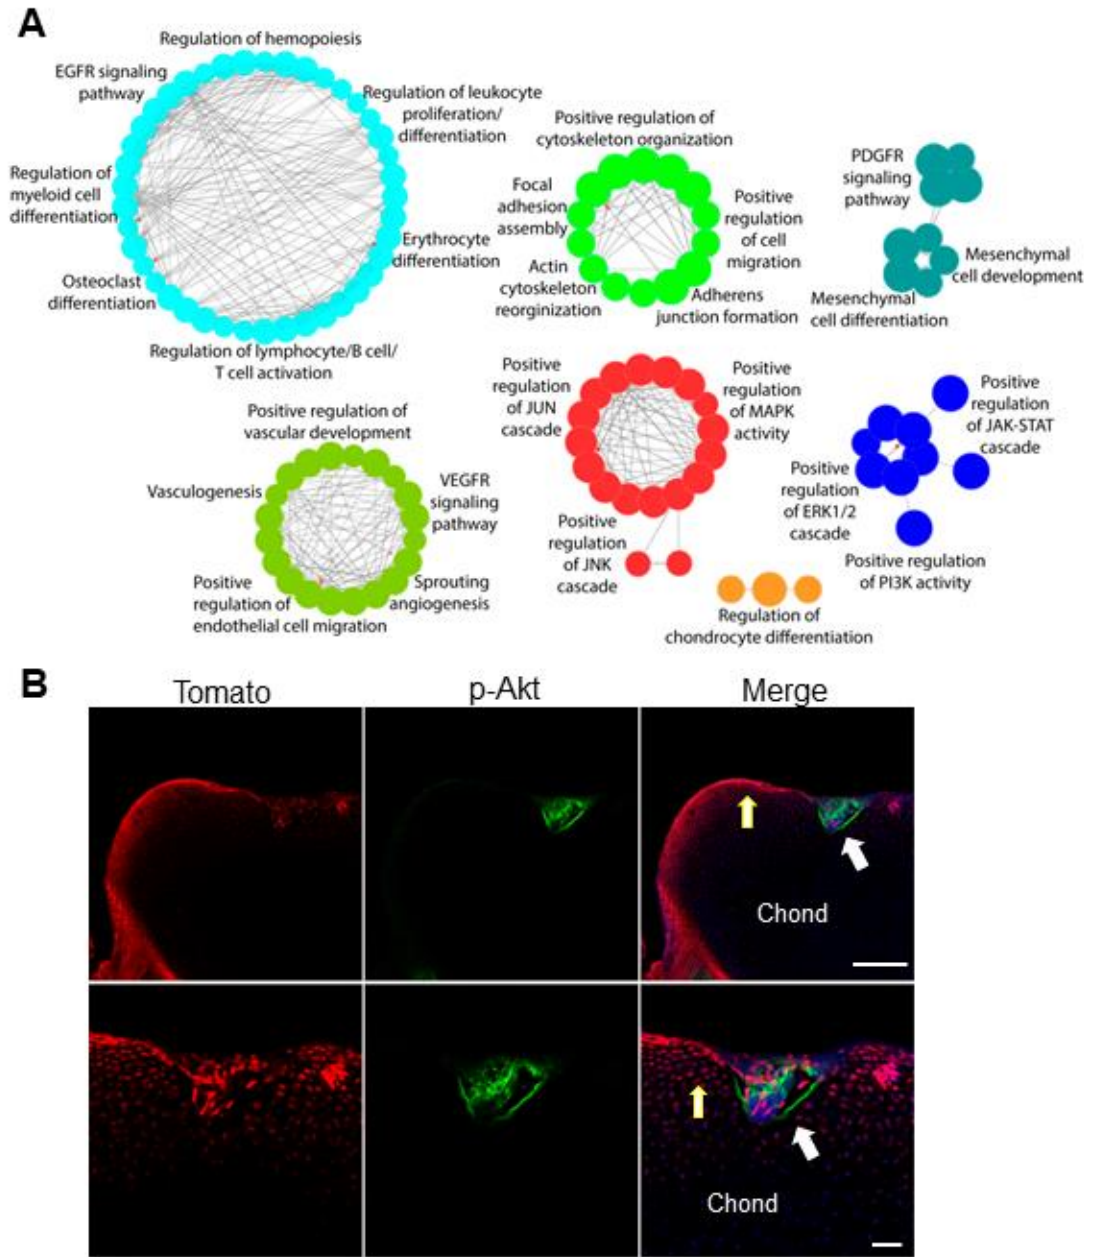

1

2 **Figure S5 Gene expression analyses associated with canal initiation and progression.**

3 (A) KEGG pathways found to be significantly regulated in the canal, relative to peri, were subjected to  
 4 GO term cluster analyses. Along with large clusters related to myeloid cell migration, differentiation, and  
 5 activation, as well as in blood vessel development, GO term clusters were observed for regulation of cell  
 6 adhesion and related signaling, mesenchymal cell differentiation, and kinase signaling through the MAPK

1 and ERK1/2 cascades. (B) Immunofluorescent staining of activated p-Akt during early canal initiation.  
 2 Yellow arrow denotes perichondrium and white arrow denotes SOC canal.

3 **Table S1 Mouse real-time PCR primer sequences used for this study.**

| Gene           | Forward primer               | Reverse primer               |
|----------------|------------------------------|------------------------------|
| <i>β-actin</i> | 5'-TCCTCCTGAGCGCAAGTACTCT-3' | 5'-CGGACTCATCGTACTCCTGCTT-3' |
| <i>Col2</i>    | 5'-GCTCCCAGAACATCACCTACCA-3' | 5'-TCATTGGAGCCCTGGATG-3'     |
| <i>Col10</i>   | 5'-GCCCGTGTCTGCTTTTACTGTC-3' | 5'-GGTCGTAATGCTGCCTAT-3'     |
| <i>Sox9</i>    | 5'-CCAACATTGAGACCTTCGACGT-3' | 5'-ATGCCTAACTGCCAGTGTAGG-3'  |
| <i>Osterix</i> | 5'-AGAGGTTCACTCGCTCTGACGA-3' | 5'-TTGCTCAAGTGGTCGCTTCTG-3'  |
| <i>IBSP</i>    | 5'-ACCAGTTATGGACCACGACA-3'   | 5'-TCAACCGTGCTGCTTTTCTG-3'   |
| <i>Ocn</i>     | 5'-GGCGTACCTGTATCAATGG-3'    | 5'-TCAGCCAACTCGTCACAGTC-3'   |
| <i>Opn</i>     | 5'-CTGGATGACCAGAGTGCTGA-3'   | 5'-TGAAATTCATGGCTGTGGAA-3'   |
| <i>Ppary</i>   | 5'-CCAGCGTGAAGCCAGAGTAG-3'   | 5'-ACCGTGGCTGTGCTCATCCT-3'   |
| <i>Cebpa</i>   | 5'-GGCCAAGAAGTCGGTGGATAA-3'  | 5'-GGAGAAGGCATGCTCATGTT-3'   |
| <i>Lpl</i>     | 5'-GCGCTCCATCCATCTTTCAT-3'   | 5'-GGCAGAGCCCTTTCTCAAATG-3'  |

4

5 **Table S2 ECM genes significantly regulated in the periarticular region (Peri) versus the**  
 6 **underlying chondrocytes (Chond).**

|                          | Gene           |                                          | Fold Change |
|--------------------------|----------------|------------------------------------------|-------------|
| <b>Enriched in Peri</b>  | <i>Col1a1</i>  | collagen, type I, alpha 1                | 9.08        |
|                          | <i>Col1a2</i>  | collagen, type I, alpha 2                | 6.20        |
|                          | <i>Col3a1</i>  | collagen, type III, alpha 1              | 2.91        |
|                          | <i>Col8a1</i>  | collagen, type VIII, alpha 1             | 3.03        |
|                          | <i>Col14a1</i> | collagen, type VIX, alpha 1              | 4.21        |
|                          | <i>Col15a1</i> | collagen, type VX, alpha 1               | 2.37        |
|                          | <i>Fn1</i>     | fibronectin 1                            | 2.59        |
|                          | <i>Eln</i>     | elastin                                  | 6.66        |
| <b>Enriched in Chond</b> | <i>Col2a1</i>  | collagen, type 2, alpha 1                | 3.64        |
|                          | <i>Col9a1</i>  | collagen, type IX, alpha 1               | 5.68        |
|                          | <i>Col9a2</i>  | collagen, type IX, alpha 2               | 5.08        |
|                          | <i>Col9a3</i>  | collagen, type IX, alpha 3               | 3.56        |
|                          | <i>Col11a1</i> | collagen, type XI, alpha 1               | 4.24        |
|                          | <i>Col11a2</i> | collagen, type XI, alpha 2               | 2.33        |
|                          | <i>Acan</i>    | aggrecan                                 | 2.90        |
|                          | <i>Hapln1</i>  | hyaluronan and proteoglycan link protein | 3.24        |

1 **Table S3 Differentially expressed genes in the cartilage underneath the canal (CNC) versus**  
 2 **neighboring epiphyseal chondrocytes (Chond).**

| Fold Change | P-val    | FDR P-val | Gene Symbol |
|-------------|----------|-----------|-------------|
| 153.77      | 5.13E-09 | 0.0002    | Mmp13       |
| 93.36       | 0.0026   | 0.6018    | Spp1        |
| 17.17       | 0.0208   | 0.815     | Dpt         |
| 9.24        | 4.46E-09 | 0.0002    | Mmp9        |
| 7.59        | 0.0193   | 0.815     | Gjc3        |
| 7.53        | 0.0397   | 0.8485    | Efemp1      |
| 6.6         | 0.0164   | 0.8042    | Gpr137b-ps  |
| 6.23        | 4.67E-06 | 0.0616    | Loxl4       |
| 5.63        | 8.76E-05 | 0.2223    | Gm13767     |
| 5.1         | 0.0019   | 0.5813    | Lef1        |
| 4.88        | 0.0005   | 0.4232    | Vdr         |
| 4.52        | 0.0011   | 0.4889    | Gm18953     |
| 4.33        | 0.001    | 0.4831    | Gm15899     |
| 4.25        | 0.0128   | 0.7964    | Ttyh2       |
| 4.24        | 0.0016   | 0.5549    | Shox2       |
| 4.11        | 0.0093   | 0.7444    | Cd68        |
| 3.97        | 0.0036   | 0.6605    | Bmp5        |
| 3.96        | 0.0085   | 0.7316    | Serpina3n   |
| 3.94        | 0.0405   | 0.8489    | Cdh5        |
| 3.79        | 0.0032   | 0.6247    | Slc14a1     |
| 3.72        | 0.0006   | 0.4232    | Usp53       |
| 3.62        | 0.0088   | 0.7349    | Plekhg1     |
| 3.53        | 0.0099   | 0.7444    | Gm13295     |
| 3.42        | 0.0241   | 0.825     | Runx2       |
| 3.4         | 0.0102   | 0.7444    | Gpr137b     |
| 3.37        | 0.0012   | 0.5061    | Fn1         |
| 3.26        | 0.0398   | 0.8485    | Kdm7a       |
| 3.22        | 0.0414   | 0.8489    | Atp6v0d2    |
| 3.22        | 0.0101   | 0.7444    | Ccdc80      |
| 3.19        | 0.0062   | 0.6715    | Avpr1a      |
| 3.19        | 0.006    | 0.6715    | Slc13a5     |
| 3.11        | 0.0092   | 0.7444    | Adm         |
| 3.1         | 0.0113   | 0.7726    | Plxnd1      |
| 3.07        | 0.0312   | 0.8284    | Lgmn        |



|      |        |        |                  |
|------|--------|--------|------------------|
| 3.04 | 0.0091 | 0.7418 | Slc25a5          |
| 2.97 | 0.0096 | 0.7444 | Gm16128          |
| 2.96 | 0.0003 | 0.3632 | Gm14897          |
| 2.92 | 0.0005 | 0.4232 | Spcs3            |
| 2.89 | 0.0009 | 0.4786 | Ddx21            |
| 2.88 | 0.0041 | 0.667  | Qpctl            |
| 2.83 | 0.018  | 0.8128 | Unc5c            |
| 2.78 | 0.0079 | 0.7189 | Gm2260           |
| 2.78 | 0.004  | 0.667  | Extl1            |
| 2.76 | 0.0137 | 0.8005 | Cirh1a           |
| 2.76 | 0.0001 | 0.2229 | Tpcn1            |
| 2.73 | 0.0013 | 0.5276 | Serinc5          |
| 2.71 | 0.0058 | 0.6715 | Plxna2           |
| 2.68 | 0.0409 | 0.8489 | Cldn34c2; Gm6604 |
| 2.68 | 0.0219 | 0.8164 | Nacc1            |
| 2.68 | 0.0007 | 0.4591 | Ptch1            |
| 2.67 | 0.0002 | 0.2769 | Kcns1            |
| 2.62 | 0.013  | 0.7971 | Actr1a           |
| 2.61 | 0.0029 | 0.6118 | Tyrobp           |
| 2.55 | 0.0064 | 0.6715 | Ctsc             |
| 2.53 | 0.0321 | 0.8309 | Erg              |
| 2.52 | 0.0086 | 0.7322 | Cpm              |
| 2.52 | 0.002  | 0.5813 | Gm525            |
| 2.49 | 0.0218 | 0.8164 | Ipo11            |
| 2.49 | 0.0195 | 0.815  | ErbB2            |
| 2.49 | 0.0022 | 0.5813 | Nploc4           |
| 2.49 | 0.0022 | 0.5813 | Epha2            |
| 2.48 | 0.0424 | 0.849  | Slc1a1           |
| 2.48 | 0.0027 | 0.6018 | Ust              |
| 2.47 | 0.0217 | 0.8164 | Pde11a           |
| 2.47 | 0.0159 | 0.8042 | Hey1             |
| 2.45 | 0.0011 | 0.4889 | Prr5             |
| 2.41 | 0.0003 | 0.3637 | Mpi              |
| 2.4  | 0.0092 | 0.7444 | Gm2274           |
| 2.36 | 0.0325 | 0.8324 | Fzd4             |
| 2.34 | 0.007  | 0.6837 | Uck2             |
| 2.33 | 0.016  | 0.8042 | Cdkn1a           |
| 2.32 | 0.0076 | 0.7098 | Gcnt2            |
| 2.32 | 0.0039 | 0.667  | Runx1            |
| 2.3  | 0.0055 | 0.6675 | Myo1d            |
| 2.3  | 0.0021 | 0.5813 | Ptprf            |
| 2.3  | 0.0017 | 0.558  | Kars             |
| 2.29 | 0.0086 | 0.7322 | Hipk2            |

|       |          |        |                  |
|-------|----------|--------|------------------|
| 2.27  | 0.0412   | 0.8489 | Ebf3             |
| 2.27  | 0.0064   | 0.6715 | Alg3             |
| 2.27  | 0.0052   | 0.667  | Muc1             |
| 2.26  | 0.0059   | 0.6715 | Gatad2a          |
| 2.25  | 0.0074   | 0.7034 | Lcp1             |
| 2.24  | 0.0263   | 0.8258 | Cspg4            |
| 2.24  | 0.0014   | 0.5332 | Srgap1           |
| 2.22  | 0.0053   | 0.667  | Gm5762           |
| 2.22  | 0.0012   | 0.5054 | Gm8822           |
| 2.21  | 0.019    | 0.815  | Mgp              |
| 2.19  | 0.0014   | 0.5276 | Chil1            |
| 2.18  | 0.0191   | 0.815  | Snap29           |
| 2.15  | 0.0132   | 0.8    | Cd302            |
| 2.15  | 0.0009   | 0.4786 | Tnfrsf21         |
| 2.15  | 0.0005   | 0.4232 | Gpc1             |
| 2.14  | 0.0045   | 0.667  | Trim8            |
| 2.14  | 0.0008   | 0.4786 | Sema7a           |
| 2.11  | 0.0117   | 0.7784 | Fos              |
| 2.11  | 0.0101   | 0.7444 | Btg1             |
| 2.1   | 0.0249   | 0.825  | Lgals3           |
| 2.1   | 0.0134   | 0.8    | Rgl1             |
| 2.09  | 0.0092   | 0.7444 | Ppil4            |
| 2.09  | 0.0008   | 0.4747 | Lrrc59           |
| 2.08  | 0.0342   | 0.8398 | Skap2            |
| 2.08  | 0.0116   | 0.7784 | Hsd17b7          |
| 2.05  | 0.0268   | 0.826  | Tgm2             |
| 2.04  | 0.0291   | 0.8284 | Bcl6             |
| 2.04  | 0.0078   | 0.7107 | Ube3c            |
| 2.04  | 0.0033   | 0.6255 | Osbpl11          |
| 2.03  | 0.0059   | 0.6715 | Grb14            |
| 2.03  | 0.0042   | 0.667  | Agps             |
| 2.03  | 0.0016   | 0.5549 | Mgat4a           |
| 2.03  | 0.0004   | 0.3944 | Ywhah            |
| 2.03  | 2.06E-05 | 0.1046 | Hmgxb3           |
| 2.01  | 0.0004   | 0.3944 | Wdr37            |
| 2.01  | 4.15E-05 | 0.1563 | Pitpnc1          |
| 2     | 0.0357   | 0.8468 | Cd86             |
| 2     | 0.0162   | 0.8042 | Ppp1r3b; Gm20359 |
| 2     | 0.0154   | 0.8042 | Kctd5            |
| -2.01 | 0.0201   | 0.815  | Clybl            |
| -2.02 | 0.0398   | 0.8485 | Cast             |

|       |        |        |                      |
|-------|--------|--------|----------------------|
| -2.03 | 0.0292 | 0.8284 | Zfp101               |
| -2.04 | 0.0455 | 0.8518 | Lym4                 |
| -2.04 | 0.0441 | 0.8506 | Cth                  |
| -2.05 | 0.0436 | 0.8506 | Ankra2               |
| -2.07 | 0.0413 | 0.8489 | Apln                 |
| -2.07 | 0.0139 | 0.8005 | Cdc20                |
| -2.07 | 0.0077 | 0.7098 | Atg14                |
| -2.07 | 0.0009 | 0.4786 | Lsm10                |
| -2.08 | 0.0418 | 0.849  | ND3                  |
| -2.08 | 0.0399 | 0.8485 | Tmem179b             |
| -2.09 | 0.0219 | 0.8164 | Triqk                |
| -2.12 | 0.0413 | 0.8489 | Csrp2                |
| -2.12 | 0.0113 | 0.7726 | Trappc6a             |
| -2.13 | 0.0015 | 0.5459 | Zfp639               |
| -2.15 | 0.016  | 0.8042 | 1700029J07Rik        |
| -2.15 | 0.0064 | 0.6715 | 2610318N02Rik        |
| -2.15 | 0.0062 | 0.6715 | Arl4a                |
| -2.16 | 0.0458 | 0.8518 | Hmgb2                |
| -2.16 | 0.0203 | 0.815  | Tpbg                 |
| -2.17 | 0.001  | 0.483  | Sclt1                |
| -2.18 | 0.0002 | 0.2769 | Fam189a1             |
| -2.19 | 0.0307 | 0.8284 | 4930452B06Rik        |
| -2.19 | 0.0259 | 0.8254 | Ppm1k                |
| -2.2  | 0.0009 | 0.4786 | Cetn4                |
| -2.21 | 0.047  | 0.8547 | Siva1                |
| -2.22 | 0.0213 | 0.815  | Morn2                |
| -2.23 | 0.0313 | 0.8284 | Pter                 |
| -2.25 | 0.0281 | 0.8261 | Fuca1                |
| -2.27 | 0.0106 | 0.7559 | Ap4s1                |
| -2.27 | 0.0094 | 0.7444 | Xlr                  |
| -2.28 | 0.0372 | 0.8474 | Tspan2               |
| -2.28 | 0.0203 | 0.815  | Igfals               |
| -2.28 | 0.0042 | 0.667  | Ivd                  |
| -2.29 | 0.0166 | 0.8042 | Hs6st2               |
| -2.3  | 0.0007 | 0.4541 | Gm11110              |
| -2.33 | 0.0175 | 0.8124 | Gm18284              |
| -2.33 | 0.0094 | 0.7444 | Uqcc3                |
| -2.33 | 0.0075 | 0.7098 | Cilp                 |
| -2.34 | 0.0317 | 0.8294 | Mrpl42               |
| -2.34 | 0.023  | 0.824  | Nduf1                |
| -2.34 | 0.0099 | 0.7444 | Slc27a6              |
| -2.34 | 0.0062 | 0.6715 | Mir181a-1; Mir181b-1 |
| -2.35 | 0.0007 | 0.4591 | S100a6               |

|       |          |        |                            |
|-------|----------|--------|----------------------------|
| -2.35 | 0.0006   | 0.4232 | Tmem107                    |
| -2.36 | 0.0433   | 0.8502 | Gm10509                    |
| -2.37 | 0.0002   | 0.314  | Sgce                       |
| -2.38 | 0.0322   | 0.8321 | Fam134c                    |
| -2.38 | 0.0243   | 0.825  | Arl6ip1                    |
| -2.39 | 0.0175   | 0.8124 | 1810062G17Rik              |
| -2.41 | 0.0028   | 0.6048 | Kazald1                    |
| -2.41 | 0.0001   | 0.2229 | Wls                        |
| -2.42 | 0.02     | 0.815  | Gdf10                      |
| -2.42 | 0.0039   | 0.667  | Ccpg1os                    |
| -2.43 | 0.0009   | 0.4786 | Tmem98                     |
| -2.45 | 0.0327   | 0.8349 | Id2                        |
| -2.46 | 0.0138   | 0.8005 | Ndrp2                      |
| -2.49 | 1.15E-05 | 0.0949 | Zfp273                     |
| -2.52 | 0.0321   | 0.8318 | Dleu2; Mir16-1;<br>Gm20034 |
| -2.53 | 0.0242   | 0.825  | Gm11114                    |
| -2.53 | 0.0182   | 0.8128 | Emp2                       |
| -2.53 | 0.0113   | 0.7738 | Ddah1                      |
| -2.54 | 0.0475   | 0.8547 | Pgrmc1                     |
| -2.56 | 0.0376   | 0.8474 | Robo1                      |
| -2.56 | 0.0298   | 0.8284 | Plxdc2                     |
| -2.57 | 9.47E-05 | 0.2229 | Zfp85                      |
| -2.6  | 0.0334   | 0.8371 | Gm15452                    |
| -2.61 | 0.0027   | 0.6018 | Map2k5                     |
| -2.63 | 0.0131   | 0.7988 | Osr2                       |
| -2.64 | 0.0058   | 0.6715 | D10Jhu81e                  |
| -2.64 | 0.0031   | 0.6118 | Gm17728                    |
| -2.64 | 0.0001   | 0.2304 | Arxes1                     |
| -2.65 | 0.0296   | 0.8284 | Cdkn3                      |
| -2.65 | 0.014    | 0.8005 | Rnf170-ps                  |
| -2.65 | 0.0018   | 0.5813 | Lmo1                       |
| -2.68 | 0.0083   | 0.7278 | Fam83d                     |
| -2.7  | 0.0182   | 0.8128 | Sppl2a                     |
| -2.71 | 0.001    | 0.4841 | Trip13                     |
| -2.71 | 0.0003   | 0.3425 | Tmem203                    |
| -2.76 | 0.011    | 0.7679 | Gm6169                     |
| -2.77 | 0.0286   | 0.8262 | Gm19945                    |
| -2.79 | 0.0148   | 0.8042 | Rabac1                     |
| -2.8  | 0.0172   | 0.8099 | Fzd8                       |
| -2.81 | 0.0043   | 0.667  | Adhfe1                     |

|       |          |        |               |
|-------|----------|--------|---------------|
| -2.83 | 0.0233   | 0.825  | Pdgfd         |
| -2.84 | 3.27E-05 | 0.154  | C130060K24Rik |
| -2.86 | 0.0108   | 0.7647 | Agtr2         |
| -2.86 | 0.0086   | 0.7322 | Gm17530       |
| -2.86 | 0.0044   | 0.667  | Nthl1         |
| -2.88 | 0.0155   | 0.8042 | Zfp654        |
| -2.9  | 0.0134   | 0.8    | Pemt          |
| -2.92 | 0.0002   | 0.3059 | Six1          |
| -2.96 | 1.49E-05 | 0.0949 | Spry3         |
| -2.98 | 0.0102   | 0.7444 | Pemt          |
| -3.06 | 0.0254   | 0.8254 | Gstk1         |
| -3.11 | 0.0379   | 0.8474 | Fkbp7         |
| -3.11 | 0.0053   | 0.667  | Calml3        |
| -3.16 | 0.0022   | 0.5813 | Meis2         |
| -3.33 | 0.018    | 0.8128 | Depdc1a       |
| -3.35 | 0.0255   | 0.8254 | Gm8707        |
| -3.37 | 0.0023   | 0.5831 | Lrrc17        |
| -3.4  | 0.0009   | 0.4786 | Nrn1          |
| -3.51 | 1.75E-05 | 0.0962 | Nipal2        |
| -3.55 | 0.0088   | 0.7349 | Spry2         |
| -3.55 | 0.0023   | 0.5865 | Mab21l2       |
| -4    | 8.61E-05 | 0.2223 | Sap30         |
| -4.03 | 0.003    | 0.6118 | Pemt          |
| -4.15 | 0.0058   | 0.6715 | Sulf2         |
| -4.56 | 0.0242   | 0.825  | Sema3e        |
| -4.65 | 0.0185   | 0.815  | Pon3          |
| -4.65 | 6.67E-05 | 0.1914 | Gpc3          |
| -4.74 | 0.0211   | 0.815  | Egfl6         |
| -4.81 | 0.0315   | 0.8292 | Hhip          |
| -4.85 | 1.58E-05 | 0.0949 | Ecm2          |
| -5.34 | 0.0079   | 0.7189 | Ndufa4l2      |
| -5.37 | 0.0167   | 0.8042 | Grem1         |
| -5.61 | 7.08E-06 | 0.0667 | Angptl1       |
| -5.76 | 0.011    | 0.7679 | Dcx           |
| -5.96 | 0.0456   | 0.8518 | Abi3bp        |
| -6.13 | 0.0022   | 0.5813 | AF357426      |
| -6.56 | 0.0153   | 0.8042 | 3830403N18Rik |

|          |        |        |                      |
|----------|--------|--------|----------------------|
| -7.13    | 0.0202 | 0.815  | Egln3                |
| -7.28    | 0.0011 | 0.4889 | Creb5; 9430076C15Rik |
| -11.57   | 0.0269 | 0.826  | Gm11168              |
| -13.7    | 0.0252 | 0.8254 | Gm10717              |
| -14.56   | 0.0119 | 0.7784 | Hoxd10               |
| -15.69   | 0.0342 | 0.8396 | Gm17535              |
| -16.4    | 0.008  | 0.719  | Gm21738              |
| -16.98   | 0.0229 | 0.8239 | Gm10719              |
| -17.75   | 0.0207 | 0.815  | Gm10720              |
| -17.94   | 0.0196 | 0.815  | Gm10715              |
| -19.05   | 0.0205 | 0.815  | Gm10718; Gm10722     |
| -20.34   | 0.0217 | 0.8164 | Gm10721              |
| -20.47   | 0.0064 | 0.6715 | Mir300               |
| -25.19   | 0.0359 | 0.8474 | Gm10801              |
| -39.87   | 0.0023 | 0.5865 | Wif1                 |
| -61.82   | 0.0205 | 0.815  | Gm10800              |
| -1521.53 | 0.0002 | 0.2769 | Prg4                 |

1

2 **Table S4 Differentially expressed genes in the cartilage canal (Canal) versus the periarticular**  
3 **region (Peri).**

| Fold Change | P-val    | FDR P-val | Gene Symbol   |
|-------------|----------|-----------|---------------|
| 237.07      | 2.12E-09 | 6.99E-05  | Mmp13         |
| 231.7       | 7.95E-13 | 5.24E-08  | Mmp9          |
| 58.6        | 0.0009   | 0.1184    | Spp1          |
| 39.49       | 5.00E-07 | 0.0033    | Bcl2a1a       |
| 25.17       | 1.56E-06 | 0.0058    | Mmp10         |
| 21.42       | 6.52E-05 | 0.024     | Mpeg1         |
| 15.29       | 0.0137   | 0.4973    | Mcpt4         |
| 14.86       | 0.0114   | 0.4606    | Clec7a        |
| 14.81       | 7.01E-05 | 0.025     | Cd68          |
| 14.62       | 2.35E-05 | 0.014     | Cd74; Mir5107 |
| 14.59       | 0.0143   | 0.5042    | Cpa3          |
| 13.83       | 1.22E-07 | 0.0013    | Ccl3          |

|       |          |        |                  |
|-------|----------|--------|------------------|
| 13.57 | 0.0006   | 0.0878 | Map3k7cl         |
| 13.27 | 0.0004   | 0.0704 | Lst1             |
| 12.67 | 0.0001   | 0.039  | Aplnr            |
| 12.57 | 4.12E-05 | 0.0211 | Atp6v0d2         |
| 11.54 | 0.0023   | 0.2016 | Cdh5             |
| 11.28 | 5.10E-06 | 0.0099 | Rac2             |
| 10.8  | 8.40E-05 | 0.0284 | Plxnd1           |
| 10.27 | 9.85E-05 | 0.0306 | Gpr137b          |
| 9.93  | 0.0003   | 0.053  | Mcam             |
| 9.74  | 0.0145   | 0.5062 | Igsf6            |
| 9.61  | 0.0053   | 0.3179 | Sele             |
| 9.61  | 0.0002   | 0.0391 | H2-Ab1           |
| 9.37  | 0.0002   | 0.0447 | Gpr137b-ps       |
| 8.96  | 0.0002   | 0.0447 | Serpina3n        |
| 8.79  | 0.0025   | 0.207  | Pecam1           |
| 8.63  | 0.0068   | 0.3658 | Slitrk6          |
| 8.44  | 3.44E-08 | 0.0008 | Podnl1           |
| 7.91  | 8.86E-08 | 0.0012 | Sema7a           |
| 7.78  | 0.0003   | 0.0559 | Ms4a7            |
| 7.72  | 0.0145   | 0.5062 | Cd93             |
| 7.28  | 2.03E-05 | 0.0128 | Bcl2a1b; Bcl2a1a |
| 6.97  | 0.004    | 0.272  | Gm15079          |
| 6.67  | 0.0008   | 0.1098 | Emcn             |
| 6.49  | 0.0471   | 0.7731 | Hsd11b2          |
| 6.39  | 0.0001   | 0.0347 | Adgrl4           |
| 6.35  | 0.0002   | 0.0391 | Apln             |
| 6.16  | 5.58E-07 | 0.0033 | Cotl1            |
| 6.08  | 0.007    | 0.3709 | Vcl              |
| 6.08  | 0.0003   | 0.0571 | Myo10            |
| 6.07  | 0.0004   | 0.0636 | Fcer1g           |
| 6.06  | 0.0003   | 0.05   | Acta2            |
| 6     | 1.22E-05 | 0.01   | Tlr13            |
| 5.9   | 0.0162   | 0.5289 | Pdgfrb           |
| 5.76  | 6.21E-05 | 0.0232 | Cnn2             |

|      |          |        |                              |
|------|----------|--------|------------------------------|
| 5.67 | 0.0009   | 0.1111 | Cd84                         |
| 5.65 | 0.0001   | 0.0329 | Kcne3                        |
| 5.62 | 7.77E-07 | 0.0043 | Lcp1                         |
| 5.59 | 0.001    | 0.126  | Cxcl16                       |
| 5.57 | 0.0021   | 0.1908 | Avpr1a                       |
| 5.49 | 0.0133   | 0.4902 | Kitl                         |
| 5.48 | 0.0023   | 0.1984 | Rspo3                        |
| 5.48 | 1.35E-07 | 0.0013 | Clec4a2                      |
| 5.45 | 0.0002   | 0.0391 | Myo1e                        |
| 5.39 | 0.0119   | 0.4683 | Tpsb2                        |
| 5.39 | 0.0149   | 0.5112 | Fabp4                        |
| 5.38 | 1.06E-05 | 0.01   | H2-Eb1                       |
| 5.37 | 0.0158   | 0.5247 | Trgj1; Tcrg-C1               |
| 5.18 | 2.95E-05 | 0.0168 | Clec4a1                      |
| 5.12 | 0.0177   | 0.5489 | Tcrg-C3                      |
| 4.97 | 0.0002   | 0.0447 | Ctsc                         |
| 4.94 | 1.41E-05 | 0.01   | Tyrobp                       |
| 4.89 | 0.0005   | 0.0792 | Apobec1                      |
| 4.87 | 0.0002   | 0.0391 | Tek                          |
| 4.86 | 0.0042   | 0.2789 | Ccl8                         |
| 4.84 | 6.13E-06 | 0.01   | Clec4n                       |
| 4.83 | 7.48E-06 | 0.01   | Akr1b8                       |
| 4.62 | 7.99E-06 | 0.01   | Cstb                         |
| 4.6  | 0.0038   | 0.2652 | Nrp1; Mir1903                |
| 4.51 | 7.81E-06 | 0.01   | Nckap1l                      |
| 4.46 | 0.007    | 0.3709 | Flna                         |
| 4.45 | 0.0002   | 0.0447 | Apod                         |
| 4.38 | 0.0012   | 0.1413 | Il1r1                        |
| 4.38 | 0.0001   | 0.0351 | Rap2a                        |
| 4.34 | 0.0003   | 0.0493 | Csf2rb; Mir7676-1; Mir7676-2 |
| 4.34 | 0.0076   | 0.3833 | Slc1a1                       |
| 4.33 | 0.0101   | 0.4294 | Ms4a14                       |
| 4.32 | 0.0012   | 0.1388 | Foxs1                        |
| 4.32 | 0.0127   | 0.4813 | Kdr                          |
| 4.2  | 0.0038   | 0.2665 | Lyz2                         |



|      |          |        |          |
|------|----------|--------|----------|
| 4.14 | 3.05E-05 | 0.017  | Cs       |
| 4.09 | 2.26E-05 | 0.0138 | Serpine2 |
| 4.04 | 0.0001   | 0.0356 | Plk2     |
| 3.96 | 0.0132   | 0.4897 | Mmrn2    |
| 3.95 | 0.0011   | 0.1295 | Jag1     |
| 3.91 | 0.0163   | 0.5298 | Mnda     |
| 3.9  | 7.66E-06 | 0.01   | Bcl2a1d  |
| 3.89 | 2.29E-05 | 0.0139 | Sstr2    |
| 3.89 | 0.0001   | 0.0346 | Lpl      |
| 3.88 | 0.0008   | 0.1072 | Timp1    |
| 3.87 | 0.0033   | 0.2443 | Fzd4     |
| 3.84 | 0.0009   | 0.1163 | Dusp6    |
| 3.81 | 1.35E-05 | 0.01   | Ptk2b    |
| 3.78 | 0.0235   | 0.6125 | Cxcl14   |
| 3.77 | 0.0002   | 0.0429 | Laptm5   |
| 3.77 | 0.0003   | 0.048  | Loxl4    |
| 3.72 | 8.80E-05 | 0.0287 | Pgf      |
| 3.72 | 0.0038   | 0.2656 | Hpgds    |
| 3.67 | 0.013    | 0.4861 | Ccr1     |
| 3.66 | 1.25E-06 | 0.0055 | Actg2    |
| 3.64 | 9.75E-05 | 0.0305 | Adam19   |
| 3.62 | 0.0001   | 0.0385 | Fabp5    |
| 3.59 | 0.0189   | 0.5618 | Slc7a7   |
| 3.59 | 0.0383   | 0.7273 | St5      |
| 3.59 | 0.0038   | 0.2665 | Nrp2     |
| 3.56 | 0.0008   | 0.1045 | Skap2    |
| 3.55 | 0.0025   | 0.207  | Steap4   |
| 3.55 | 0.0014   | 0.1498 | Slc25a5  |
| 3.51 | 0.0012   | 0.1394 | Vcam1    |
| 3.48 | 0.0215   | 0.5913 | Hey1     |
| 3.48 | 0.0002   | 0.0447 | Atp6v1b2 |
| 3.46 | 0.0019   | 0.1771 | Npl      |
| 3.44 | 0.0012   | 0.1373 | sept11   |
| 3.43 | 0.0071   | 0.3719 | Dhcr24   |
| 3.43 | 0.0042   | 0.2783 | Sh3pxd2b |
| 3.42 | 0.0222   | 0.5996 | Ednrb    |

|      |          |        |                               |
|------|----------|--------|-------------------------------|
| 3.42 | 0.0006   | 0.0919 | Svep1                         |
| 3.38 | 0.0186   | 0.5601 | Pdgfd                         |
| 3.37 | 0.0051   | 0.3135 | Slco2a1                       |
| 3.36 | 0.0008   | 0.1038 | Lgmn                          |
| 3.33 | 0.0009   | 0.1184 | Arap3; Mir6981                |
| 3.29 | 0.0002   | 0.0447 | Plxna2                        |
| 3.28 | 0.0013   | 0.1443 | Gm13772                       |
| 3.28 | 0.0004   | 0.0622 | Csf2rb2; Mir7676-1; Mir7676-2 |
| 3.27 | 0.004    | 0.2729 | Rbp1                          |
| 3.25 | 0.0292   | 0.6677 | Ear12; Ear2; Ear3             |
| 3.25 | 0.0452   | 0.7664 | Ptprb                         |
| 3.22 | 1.26E-05 | 0.01   | Cemip                         |
| 3.21 | 0.0001   | 0.0351 | Tagln                         |
| 3.21 | 0.0373   | 0.7206 | Cma1                          |
| 3.21 | 0.0001   | 0.0389 | Plbd1                         |
| 3.2  | 0.0002   | 0.0422 | Slc37a2                       |
| 3.19 | 0.0293   | 0.6681 | Slfn2                         |
| 3.19 | 6.17E-05 | 0.0232 | Spns2                         |
| 3.18 | 0.0013   | 0.1443 | Lmcd1                         |
| 3.18 | 8.47E-05 | 0.0284 | Cybb                          |
| 3.17 | 0.0004   | 0.0636 | Arhgap18                      |
| 3.16 | 0.0038   | 0.2656 | Mcoln2                        |
| 3.16 | 1.04E-05 | 0.01   | Hmga1-rs1                     |
| 3.15 | 0.0298   | 0.6723 | Eef1e1                        |
| 3.14 | 0.0086   | 0.4022 | Nid2                          |
| 3.14 | 0.0015   | 0.1577 | F11r                          |
| 3.11 | 0.0009   | 0.1184 | Ctsk                          |
| 3.09 | 0.0003   | 0.0486 | Gm14063; RP23-109J20.1        |
| 3.09 | 0.0159   | 0.5255 | Marcks                        |
| 3.08 | 0.0164   | 0.5324 | Ldb2                          |
| 3.07 | 0.0012   | 0.1394 | Myd88                         |
| 3.04 | 1.36E-05 | 0.01   | Clec12a                       |
| 3.04 | 0.0264   | 0.6423 | Prcp                          |
| 3.03 | 0.0005   | 0.0788 | Clec4d                        |
| 3.03 | 1.77E-05 | 0.0117 | Lgi1                          |
| 3.02 | 1.15E-05 | 0.01   | Ecscr                         |

|      |          |        |                       |
|------|----------|--------|-----------------------|
| 3.01 | 0.0024   | 0.2042 | Il1rn                 |
| 3    | 0.0001   | 0.0351 | Casp1                 |
| 3    | 0.0022   | 0.1972 | Gm11625               |
| 3    | 0.0282   | 0.6591 | Il6st                 |
| 2.99 | 1.34E-05 | 0.01   | Tgfb1                 |
| 2.98 | 0.0132   | 0.4901 | Lbh                   |
| 2.98 | 0.0146   | 0.507  | Myh9                  |
| 2.97 | 0.001    | 0.1187 | Serpine1              |
| 2.97 | 0.0001   | 0.0356 | Tubg1                 |
| 2.96 | 3.93E-05 | 0.0204 | Mcm5                  |
| 2.96 | 0.0067   | 0.3642 | Ctla2a                |
| 2.96 | 0.0202   | 0.5747 | Ifi204                |
| 2.96 | 0.0033   | 0.2447 | Tm4sf19               |
| 2.96 | 0.0007   | 0.0986 | Eif2s1                |
| 2.95 | 0.0005   | 0.0795 | Epha2                 |
| 2.93 | 0.0136   | 0.4949 | Gpr31b; Gpr31c        |
| 2.93 | 0.0006   | 0.09   | Gsr                   |
| 2.92 | 0.0159   | 0.5253 | Gng11                 |
| 2.92 | 0.007    | 0.37   | Pak1                  |
| 2.9  | 0.0124   | 0.4771 | P2ry12                |
| 2.9  | 9.41E-05 | 0.0299 | Plet1                 |
| 2.89 | 0.006    | 0.3438 | Il13ra1               |
| 2.89 | 0.0302   | 0.6754 | Asb4                  |
| 2.89 | 3.60E-06 | 0.0082 | Wisp2                 |
| 2.88 | 0.0003   | 0.0539 | Cebpd                 |
| 2.87 | 0.0024   | 0.2063 | Ddx21                 |
| 2.87 | 0.0005   | 0.0726 | Casp8                 |
| 2.87 | 0.0043   | 0.2825 | Ece1                  |
| 2.86 | 0.0019   | 0.1813 | Cblb                  |
| 2.85 | 0.0034   | 0.2494 | Evi2a; Evi2b; Gm21975 |
| 2.84 | 0.0009   | 0.1179 | Nr2f2                 |
| 2.83 | 0.0118   | 0.4666 | Lyz1                  |
| 2.83 | 4.50E-05 | 0.0225 | Tnfsf11               |
| 2.82 | 0.0471   | 0.7731 | Sdpr                  |
| 2.82 | 0.0003   | 0.0467 | Icam1                 |
| 2.8  | 0.0104   | 0.438  | Gm13767               |
| 2.79 | 0.0002   | 0.0447 | Adamts4               |
| 2.78 | 1.00E-05 | 0.01   | Chil1                 |

|      |          |        |               |
|------|----------|--------|---------------|
| 2.75 | 7.06E-06 | 0.01   | Fscn1         |
| 2.75 | 0.0005   | 0.073  | Hmox1         |
| 2.74 | 0.0283   | 0.6598 | Fam43a        |
| 2.74 | 0.0119   | 0.4683 | Ptprk         |
| 2.72 | 0.0074   | 0.3796 | Myl9          |
| 2.71 | 0.016    | 0.5263 | Pla2g7        |
| 2.71 | 1.41E-05 | 0.01   | Slc9b2        |
| 2.7  | 0.0459   | 0.7675 | Acp5          |
| 2.7  | 4.56E-05 | 0.0226 | S1pr3         |
| 2.7  | 0.0168   | 0.538  | Cmtm3         |
| 2.69 | 0.0029   | 0.2266 | Cirh1a        |
| 2.69 | 0.0024   | 0.206  | Rad9a         |
| 2.68 | 0.0013   | 0.1494 | Olfr111       |
| 2.67 | 0.0053   | 0.3185 | Mcts2         |
| 2.67 | 9.71E-05 | 0.0305 | Dusp5         |
| 2.67 | 0.0049   | 0.3078 | Fmo1          |
| 2.67 | 0.0056   | 0.3283 | Penk          |
| 2.66 | 0.0014   | 0.1519 | Cfl1          |
| 2.66 | 0.0087   | 0.4022 | Dcstamp       |
| 2.66 | 0.0107   | 0.446  | Larp4         |
| 2.66 | 0.0099   | 0.425  | Map2k4        |
| 2.65 | 0.0103   | 0.4361 | Cdkn2aipnl    |
| 2.65 | 0.0264   | 0.642  | Gimap4        |
| 2.65 | 0.0004   | 0.0594 | Lcp2          |
| 2.64 | 0.0163   | 0.5298 | Dtx4          |
| 2.64 | 0.002    | 0.1841 | Neurl3        |
| 2.64 | 0.0254   | 0.6326 | Slc7a5        |
| 2.62 | 0.0113   | 0.4583 | Haus6         |
| 2.61 | 0.0008   | 0.1045 | Spry4         |
| 2.61 | 0.0008   | 0.1038 | Gadd45g       |
| 2.6  | 0.0001   | 0.0364 | Gpc1          |
| 2.6  | 0.0005   | 0.0795 | Adam23        |
| 2.58 | 0.0281   | 0.6582 | Gm7665        |
| 2.57 | 0.0312   | 0.6828 | 2900026A02Rik |
| 2.56 | 0.0034   | 0.2487 | Tm4sf1        |
| 2.56 | 0.0069   | 0.3684 | Gm15428       |
| 2.55 | 0.0122   | 0.4738 | Adssl1        |
| 2.55 | 1.15E-05 | 0.01   | Tcirg1        |
| 2.55 | 0.0015   | 0.1594 | Entpd1        |

|      |          |        |                       |
|------|----------|--------|-----------------------|
| 2.54 | 0.003    | 0.2317 | Nampt                 |
| 2.54 | 0.0016   | 0.1621 | Golm1                 |
| 2.54 | 0.0031   | 0.2366 | Actn1                 |
| 2.53 | 0.0074   | 0.3796 | Pik3cb                |
| 2.53 | 0.0007   | 0.0986 | Tnfrsf21              |
| 2.53 | 0.0431   | 0.755  | Nolc1                 |
| 2.52 | 3.46E-05 | 0.0187 | Plek                  |
| 2.51 | 0.0024   | 0.2043 | Gm14699               |
| 2.51 | 0.0047   | 0.2955 | Nacc1                 |
| 2.48 | 0.0219   | 0.5969 | Adamts1               |
| 2.47 | 0.0266   | 0.6431 | Arhgdib               |
| 2.47 | 0.0226   | 0.6032 | Gm15899               |
| 2.46 | 0.0007   | 0.0956 | Hcls1                 |
| 2.46 | 0.0117   | 0.4656 | Slc18a1               |
| 2.45 | 0.0005   | 0.0763 | Gm14708; RP23-224M8.3 |
| 2.43 | 0.0116   | 0.4645 | Mmp3                  |
| 2.43 | 0.0025   | 0.207  | Tlr7                  |
| 2.43 | 0.0004   | 0.0639 | Parvb                 |
| 2.42 | 0.005    | 0.3104 | Chrdl1                |
| 2.42 | 1.27E-05 | 0.01   | Pitpnc1               |
| 2.41 | 0.0013   | 0.1478 | Cyr61                 |
| 2.41 | 0.0367   | 0.716  | Clec4a3               |
| 2.4  | 0.0131   | 0.4879 | Atp6v1c1              |
| 2.4  | 8.66E-06 | 0.01   | Flt4                  |
| 2.39 | 0.0198   | 0.5706 | Havcr2                |
| 2.39 | 0.011    | 0.4515 | Atp8b1                |
| 2.39 | 0.0203   | 0.5752 | Cdh19                 |
| 2.39 | 0.0425   | 0.7527 | Ndst1                 |
| 2.39 | 0.0053   | 0.3181 | 2810025M15Rik         |
| 2.39 | 0.0054   | 0.3217 | Cbl                   |
| 2.39 | 0.0248   | 0.6267 | Tgfbr1                |
| 2.38 | 0.0076   | 0.3841 | Lipa                  |
| 2.38 | 0.0004   | 0.0617 | Gm19505               |
| 2.38 | 0.0329   | 0.692  | Ebf2                  |
| 2.38 | 0.0454   | 0.7667 | Il1b                  |
| 2.38 | 0.0016   | 0.1624 | Pum3                  |
| 2.38 | 0.0348   | 0.7029 | Pls3                  |
| 2.38 | 0.0022   | 0.1942 | Gm5762                |
| 2.38 | 0.0034   | 0.2502 | Tmem161b              |
| 2.37 | 0.0004   | 0.0639 | Tacr1                 |

|      |          |        |                 |
|------|----------|--------|-----------------|
| 2.37 | 0.012    | 0.4708 | Fads3           |
| 2.37 | 0.0005   | 0.0776 | Ocstamp         |
| 2.37 | 0.0265   | 0.6423 | Exoc6           |
| 2.37 | 1.06E-05 | 0.01   | Schip1; Gm21949 |
| 2.37 | 0.0176   | 0.545  | Ccnd1; Mir3962  |
| 2.37 | 0.0255   | 0.6335 | Slc9a7          |
| 2.36 | 0.0037   | 0.2622 | Prr5            |
| 2.36 | 0.0114   | 0.4605 | Notch3          |
| 2.35 | 0.0189   | 0.5618 | Sema6b          |
| 2.35 | 0.0088   | 0.4043 | P2ry13          |
| 2.35 | 4.73E-05 | 0.023  | Lat             |
| 2.34 | 0.0002   | 0.0414 | Mafb            |
| 2.34 | 0.0091   | 0.4104 | Lgi2            |
| 2.34 | 0.021    | 0.5851 | Adamts5         |
| 2.34 | 0.0052   | 0.3157 | Stab1           |
| 2.34 | 0.0001   | 0.0312 | Selp            |
| 2.33 | 0.0391   | 0.7332 | Dimt1           |
| 2.33 | 0.0079   | 0.3923 | Hacd2           |
| 2.33 | 3.89E-05 | 0.0204 | Gap43           |
| 2.33 | 0.0359   | 0.7088 | Chchd3          |
| 2.32 | 0.0081   | 0.3985 | Pbk             |
| 2.31 | 0.0398   | 0.7371 | Slc9a9          |
| 2.31 | 0.0103   | 0.4358 | Slit3           |
| 2.31 | 0.0032   | 0.2407 | Angpt2          |
| 2.31 | 0.0401   | 0.739  | Adgra2; Adgra3  |
| 2.3  | 0.0084   | 0.4022 | Ifi202b; Ifi205 |
| 2.3  | 0.0121   | 0.472  | Zfp946          |
| 2.3  | 0.0088   | 0.4038 | Pdxk            |
| 2.29 | 0.033    | 0.6924 | Rlbp1           |
| 2.29 | 0.0011   | 0.1277 | Gm10087         |
| 2.29 | 7.27E-05 | 0.0255 | Pcdh17          |
| 2.28 | 0.0382   | 0.7265 | Snrpd3          |
| 2.28 | 0.0359   | 0.7088 | Cd200           |
| 2.27 | 0.0014   | 0.1513 | Sema6a          |
| 2.27 | 0.0287   | 0.6629 | Zak             |
| 2.27 | 9.41E-05 | 0.0299 | Il2rg           |
| 2.27 | 0.0133   | 0.4914 | Casp4           |
| 2.26 | 0.001    | 0.1273 | Actr3           |
| 2.26 | 0.0064   | 0.3551 | Ndnf            |

|      |          |        |                        |
|------|----------|--------|------------------------|
| 2.26 | 0.0195   | 0.5673 | Pira1                  |
| 2.26 | 0.0002   | 0.0416 | Abhd17c                |
| 2.25 | 0.0157   | 0.5237 | Rgs16                  |
| 2.25 | 0.0009   | 0.1182 | ND2                    |
| 2.25 | 0.0001   | 0.039  | Ptpn6                  |
| 2.25 | 0.0021   | 0.1896 | Cluh                   |
| 2.24 | 0.0018   | 0.1739 | Bysl                   |
| 2.24 | 3.74E-05 | 0.0199 | Fermt3                 |
| 2.24 | 3.02E-05 | 0.017  | Ipo5                   |
| 2.24 | 0.0012   | 0.1397 | Gm13701; RP23-202M10.1 |
| 2.24 | 0.0018   | 0.1739 | Timp3                  |
| 2.23 | 0.002    | 0.1852 | Tubb6                  |
| 2.23 | 0.0019   | 0.1818 | Fcgr1                  |
| 2.23 | 0.0467   | 0.7716 | Bmp5                   |
| 2.23 | 0.0073   | 0.3775 | Runx1                  |
| 2.22 | 0.0021   | 0.1908 | Abce1                  |
| 2.22 | 0.0182   | 0.5542 | Tjp1                   |
| 2.2  | 0.0013   | 0.1443 | Bmp2k                  |
| 2.2  | 0.0036   | 0.2538 | Ms4a6d                 |
| 2.19 | 0.0141   | 0.5024 | Prkar2b                |
| 2.18 | 0.0063   | 0.3514 | Tbc1d8                 |
| 2.18 | 1.44E-06 | 0.0058 | Cd244                  |
| 2.17 | 0.0004   | 0.0639 | Klk10                  |
| 2.17 | 0.0066   | 0.3628 | Ugcg                   |
| 2.17 | 0.0094   | 0.4174 | Smap2                  |
| 2.16 | 0.0003   | 0.0466 | Wdr36                  |
| 2.16 | 0.0049   | 0.3061 | Tgm2                   |
| 2.15 | 0.0079   | 0.3923 | Ceacam1                |
| 2.15 | 0.0122   | 0.4738 | Hexb                   |
| 2.15 | 5.81E-05 | 0.0232 | Coq3                   |
| 2.15 | 0.0022   | 0.1966 | Cct6a; Snora15         |
| 2.14 | 0.0041   | 0.2779 | Nudt4                  |
| 2.14 | 0.0033   | 0.2473 | Angptl4                |
| 2.14 | 0.0006   | 0.0917 | Tpm4                   |
| 2.13 | 0.009    | 0.4061 | Rasal2                 |
| 2.13 | 0.0134   | 0.4925 | Tpm1                   |
| 2.13 | 0.0211   | 0.5858 | Arrb2; Mir7115         |
| 2.13 | 5.44E-05 | 0.0232 | Btk                    |

|      |          |        |                   |
|------|----------|--------|-------------------|
| 2.12 | 1.08E-05 | 0.01   | Map4k4            |
| 2.12 | 0.0324   | 0.6901 | Phxr4             |
| 2.12 | 0.0109   | 0.4515 | Gm12858           |
| 2.11 | 0.0012   | 0.1373 | Zfp36             |
| 2.11 | 0.0321   | 0.6867 | Rhod              |
| 2.11 | 2.19E-05 | 0.0136 | Heatr1            |
| 2.11 | 0.0002   | 0.0437 | Gm8822            |
| 2.11 | 1.86E-05 | 0.012  | Rqcd1             |
| 2.1  | 0.0263   | 0.6416 | Lrrc8b            |
| 2.1  | 0.0049   | 0.3076 | Cenpe             |
| 2.1  | 0.0022   | 0.1972 | Rlim              |
| 2.1  | 5.35E-06 | 0.01   | Glipr1            |
| 2.1  | 4.87E-05 | 0.0232 | Inpp5d            |
| 2.1  | 0.002    | 0.1856 | Tes               |
| 2.09 | 0.0015   | 0.1596 | Efhd2             |
| 2.08 | 0.0044   | 0.2857 | Ctsb              |
| 2.08 | 0.0089   | 0.4061 | Tmem173           |
| 2.08 | 0.0473   | 0.7736 | Cxcr4             |
| 2.08 | 0.0343   | 0.7001 | Lef1              |
| 2.08 | 8.73E-05 | 0.0287 | Pilra             |
| 2.08 | 0.0462   | 0.7682 | Nmd3              |
| 2.08 | 0.0019   | 0.1826 | Fyb               |
| 2.08 | 0.0029   | 0.227  | Ehd4              |
| 2.07 | 0.0003   | 0.0559 | AF251705          |
| 2.07 | 0.044    | 0.7601 | Mcm3              |
| 2.07 | 0.0124   | 0.4765 | Actg-ps1; Gm23812 |
| 2.07 | 0.0364   | 0.7139 | Hspa5             |
| 2.07 | 0.0393   | 0.7335 | Usp31             |
| 2.06 | 0.0003   | 0.0549 | Pde1b             |
| 2.06 | 0.0044   | 0.2848 | Lum               |
| 2.06 | 0.0146   | 0.5072 | Nol10             |
| 2.06 | 0.022    | 0.5986 | Runx2             |
| 2.05 | 0.0029   | 0.229  | Mapk11            |
| 2.05 | 0.0004   | 0.0639 | Myct1             |
| 2.05 | 0.0011   | 0.1362 | Cttnbp2nl         |
| 2.05 | 0.0015   | 0.1577 | Apbb1ip           |
| 2.05 | 0.003    | 0.2332 | Ccl9              |
| 2.05 | 0.0001   | 0.0385 | Ttll12            |



|       |          |        |                         |
|-------|----------|--------|-------------------------|
| 2.04  | 0.0138   | 0.4985 | Gucy1b3                 |
| 2.04  | 0.0111   | 0.4537 | S100a11                 |
| 2.04  | 0.0257   | 0.6352 | Ing5                    |
| 2.04  | 0.0245   | 0.6247 | Uchl5                   |
| 2.04  | 0.0159   | 0.5258 | Rgl1                    |
| 2.04  | 9.59E-05 | 0.0303 | Galnt10                 |
| 2.04  | 0.015    | 0.5129 | Pvr                     |
| 2.04  | 0.0244   | 0.624  | Cdk6                    |
| 2.04  | 8.12E-06 | 0.01   | Ptpre                   |
| 2.03  | 0.0368   | 0.716  | Gm10222                 |
| 2.03  | 0.0111   | 0.4543 | Sirpa                   |
| 2.03  | 0.0004   | 0.0666 | Tie1                    |
| 2.03  | 0.0245   | 0.6247 | Btg1                    |
| 2.02  | 0.0005   | 0.0813 | Cyth4                   |
| 2.02  | 0.0242   | 0.6212 | Cks1b                   |
| 2.02  | 0.0423   | 0.7524 | Slc43a3                 |
| 2.02  | 0.0004   | 0.0622 | Rsl1d1                  |
| 2.01  | 0.0265   | 0.6423 | Ms4a6c                  |
| 2.01  | 0.0348   | 0.7028 | Gars                    |
| 2.01  | 0.0034   | 0.2496 | Slc11a1                 |
| 2.01  | 0.0013   | 0.1443 | Etv6                    |
| 2.01  | 0.0227   | 0.6041 | Gm13252                 |
| 2.01  | 0.0135   | 0.4929 | Lyn                     |
| 2.01  | 0.047    | 0.7731 | Cyfip1                  |
| 2.01  | 0.0042   | 0.2788 | Zswim6                  |
| 2     | 0.0127   | 0.4811 | Slc38a4                 |
| 2     | 0.0017   | 0.1647 | Sh3bgrl3                |
| 2     | 0.0003   | 0.0575 | Sorcs2                  |
| 2     | 0.0015   | 0.1592 | Ubap2                   |
| 2     | 0.0014   | 0.1556 | Acsl1                   |
| -2.01 | 0.049    | 0.781  | Gm6954                  |
| -2.01 | 0.0365   | 0.7147 | Mapk8ip1                |
| -2.01 | 0.0085   | 0.4022 | Dleu2; Mir16-1; Gm20034 |
| -2.02 | 9.43E-05 | 0.0299 | Glt8d1                  |
| -2.02 | 5.45E-05 | 0.0232 | Plac9b; Plac9a          |
| -2.02 | 0.0075   | 0.3826 | Comp                    |
| -2.02 | 0.0187   | 0.5601 | Sema5a                  |
| -2.03 | 0.0215   | 0.592  | Fam150b                 |
| -2.03 | 0.0133   | 0.4902 | Cyp39a1                 |

|       |          |        |               |
|-------|----------|--------|---------------|
| -2.03 | 0.0068   | 0.3662 | H2afv         |
| -2.03 | 6.42E-05 | 0.0238 | Ndn           |
| -2.03 | 0.0352   | 0.7057 | Rbp4          |
| -2.03 | 0.0073   | 0.378  | Fxyd1         |
| -2.03 | 0.0032   | 0.2407 | Mpnd          |
| -2.03 | 0.0209   | 0.5833 | Cask          |
| -2.03 | 0.0155   | 0.519  | Plxdc1        |
| -2.03 | 0.0007   | 0.1007 | Itpr2         |
| -2.04 | 0.0065   | 0.3602 | Irak1bp1      |
| -2.04 | 0.0314   | 0.6839 | Isoc1         |
| -2.04 | 0.0384   | 0.7276 | Alcam         |
| -2.04 | 0.0205   | 0.5781 | Mxra8         |
| -2.05 | 0.0116   | 0.4645 | Kdm3a         |
| -2.05 | 0.0272   | 0.648  | Rarres1       |
| -2.05 | 0.0455   | 0.7667 | Klf12         |
| -2.05 | 0.0126   | 0.4779 | Sox5          |
| -2.05 | 0.0458   | 0.7675 | Carf          |
| -2.06 | 0.0007   | 0.0968 | Tmem218       |
| -2.06 | 0.0184   | 0.5574 | Tcta          |
| -2.06 | 0.0002   | 0.0414 | Iqgap2        |
| -2.07 | 0.0464   | 0.7694 | Ogfod3        |
| -2.07 | 0.0014   | 0.1508 | Thsd4         |
| -2.08 | 0.036    | 0.7097 | Insl6         |
| -2.08 | 0.0048   | 0.3006 | Tcp1112       |
| -2.09 | 0.0011   | 0.1334 | Plat          |
| -2.09 | 0.0029   | 0.2267 | Sash1         |
| -2.09 | 0.0325   | 0.6903 | Gm14569       |
| -2.1  | 0.005    | 0.3101 | 4930523C07Rik |
| -2.1  | 0.0187   | 0.5601 | Fut10         |
| -2.11 | 0.0033   | 0.2458 | S100a6        |
| -2.11 | 0.0013   | 0.1438 | 9130023H24Rik |
| -2.11 | 0.0193   | 0.5666 | Tgfbr3        |
| -2.11 | 0.0004   | 0.0642 | Rerg          |
| -2.13 | 0.0455   | 0.7667 | Stk38l        |
| -2.14 | 0.0002   | 0.0447 | Itih2         |
| -2.14 | 0.0055   | 0.3257 | Ltbp3         |
| -2.14 | 0.0034   | 0.2494 | Pappa         |
| -2.15 | 0.0019   | 0.1769 | Prdx4         |
| -2.16 | 0.0093   | 0.4142 | Rnf39         |
| -2.16 | 0.0015   | 0.1566 | Sept6         |
| -2.16 | 0.0245   | 0.6247 | Ttc26         |
| -2.17 | 0.014    | 0.5015 | Emp2          |

|       |          |        |                         |
|-------|----------|--------|-------------------------|
| -2.17 | 0.0341   | 0.6992 | Gm9830                  |
| -2.17 | 0.0012   | 0.141  | Cox6b2                  |
| -2.18 | 0.0006   | 0.0834 | Ackr2                   |
| -2.19 | 0.0004   | 0.067  | Vsir                    |
| -2.21 | 0.0049   | 0.308  | Desi2; Gm9982           |
| -2.21 | 0.0009   | 0.1139 | Rnf167                  |
| -2.21 | 0.0343   | 0.7001 | S100a4                  |
| -2.23 | 0.0083   | 0.4022 | Boc                     |
| -2.23 | 0.0024   | 0.2019 | Gnpat1                  |
| -2.24 | 0.0443   | 0.7614 | Dpysl2                  |
| -2.25 | 0.0127   | 0.4812 | Rabac1                  |
| -2.25 | 0.0463   | 0.769  | Fam101b                 |
| -2.25 | 0.0169   | 0.5383 | Thbs3                   |
| -2.26 | 0.0208   | 0.5819 | Atp2b4; Mir6903         |
| -2.26 | 0.0043   | 0.2823 | Gm12697                 |
| -2.26 | 0.0012   | 0.1384 | Gm14396; RP23-313J15.11 |
| -2.27 | 0.0001   | 0.0364 | Btc                     |
| -2.27 | 0.0222   | 0.5996 | Alox12                  |
| -2.27 | 0.0185   | 0.5582 | Ddx26b                  |
| -2.28 | 0.0252   | 0.6308 | Psenen                  |
| -2.28 | 0.0451   | 0.766  | Ltbp2                   |
| -2.28 | 0.0428   | 0.754  | Triqk                   |
| -2.28 | 0.002    | 0.1863 | Hspb8                   |
| -2.31 | 0.0094   | 0.4171 | Tmem203                 |
| -2.31 | 0.0266   | 0.6431 | Txndc15                 |
| -2.31 | 2.69E-05 | 0.0157 | Six2                    |
| -2.31 | 0.0228   | 0.6049 | Tmtc1                   |
| -2.32 | 0.002    | 0.1841 | Thap3                   |
| -2.33 | 0.0007   | 0.0986 | Rin2                    |
| -2.35 | 4.63E-05 | 0.0228 | Fmod                    |
| -2.35 | 0.019    | 0.5628 | Arntl                   |
| -2.36 | 0.0012   | 0.1373 | Fam234a                 |
| -2.36 | 0.0387   | 0.7295 | AF357426                |
| -2.36 | 0.0017   | 0.1711 | Ninj1                   |
| -2.37 | 0.0406   | 0.7409 | Plek2                   |
| -2.38 | 0.0003   | 0.0495 | Plac9b; Plac9a          |
| -2.38 | 0.0023   | 0.1984 | Emp3                    |
| -2.38 | 0.0079   | 0.3945 | Gm6712                  |
| -2.39 | 0.0159   | 0.5253 | Cachd1                  |
| -2.41 | 0.0458   | 0.7675 | Zfp960                  |
| -2.42 | 0.0067   | 0.3657 | Tppp3                   |

|       |          |        |                        |
|-------|----------|--------|------------------------|
| -2.43 | 0.0199   | 0.572  | 1600002K03Rik          |
| -2.43 | 0.0117   | 0.4656 | Aga                    |
| -2.45 | 0.0134   | 0.4925 | Kcnk6                  |
| -2.46 | 0.0081   | 0.3979 | Itga10                 |
| -2.48 | 0.0334   | 0.6928 | Zfp712                 |
| -2.48 | 0.0026   | 0.2089 | Dnm1                   |
| -2.48 | 0.0227   | 0.6041 | Robo1                  |
| -2.48 | 0.0063   | 0.3534 | Gm6712                 |
| -2.49 | 0.0035   | 0.2512 | Daam2                  |
| -2.53 | 0.0009   | 0.1184 | Hmgn3                  |
| -2.54 | 0.0198   | 0.5705 | Colec12                |
| -2.54 | 0.0112   | 0.4574 | Dock6                  |
| -2.55 | 0.0041   | 0.2779 | Smpd3a                 |
| -2.57 | 0.0294   | 0.6697 | 2010111101Rik          |
| -2.57 | 0.0005   | 0.0799 | Bbs9                   |
| -2.58 | 0.0174   | 0.5449 | Islr                   |
| -2.58 | 9.94E-06 | 0.01   | Nupr1                  |
| -2.61 | 0.0041   | 0.2779 | Tmem63a                |
| -2.62 | 0.0083   | 0.4022 | Plxdc2                 |
| -2.66 | 0.0184   | 0.5572 | Nme5                   |
| -2.66 | 0.001    | 0.1243 | Ggh                    |
| -2.69 | 0.0393   | 0.7335 | Mmp2                   |
| -2.7  | 0.0002   | 0.0442 | Sbsn                   |
| -2.73 | 0.0452   | 0.7664 | Fam151b                |
| -2.74 | 0.0192   | 0.5659 | Adgrg2                 |
| -2.74 | 0.0234   | 0.6102 | Fzd8                   |
| -2.75 | 8.73E-05 | 0.0287 | Plac9b; Plac9a; Gm9780 |
| -2.76 | 0.0006   | 0.0848 | Barx1                  |
| -2.79 | 0.0001   | 0.0369 | Selenbp1               |
| -2.8  | 0.0069   | 0.3688 | Slc27a6                |
| -2.8  | 0.0021   | 0.1874 | Npnt                   |
| -2.8  | 0.0199   | 0.571  | Fap                    |
| -2.81 | 0.0166   | 0.5355 | Cacna1g                |
| -2.81 | 0.0017   | 0.1688 | Fam129a                |
| -2.83 | 0.0004   | 0.0606 | Znrf3                  |
| -2.83 | 0.0008   | 0.1094 | Sh3d19                 |
| -2.85 | 0.0186   | 0.5601 | 1810062G17Rik          |
| -2.85 | 0.0239   | 0.616  | Gsg1l                  |
| -2.86 | 0.0018   | 0.1731 | Pgrmc1                 |
| -2.87 | 0.0002   | 0.0416 | Nr1d1                  |

|       |          |        |               |
|-------|----------|--------|---------------|
| -2.94 | 6.99E-05 | 0.025  | Cc2d2a        |
| -2.95 | 0.0014   | 0.1508 | Gprc5a        |
| -2.97 | 0.002    | 0.1863 | Car5b         |
| -2.97 | 0.0047   | 0.2993 | Kcnma1        |
| -3.04 | 0.0022   | 0.193  | Rora          |
| -3.09 | 0.003    | 0.2333 | Sema3e        |
| -3.14 | 0.0289   | 0.6648 | Lrrn4cl       |
| -3.16 | 0.0021   | 0.1875 | Mamdc2        |
| -3.16 | 0.0044   | 0.2869 | Smoc1         |
| -3.18 | 0.0305   | 0.6782 | Slc9a3r1      |
| -3.19 | 0.009    | 0.4071 | 1500009L16Rik |
| -3.24 | 0.0029   | 0.2261 | Tbx4          |
| -3.24 | 0.0085   | 0.4022 | Vsig4         |
| -3.33 | 0.0292   | 0.6677 | Lipo1         |
| -3.36 | 8.03E-05 | 0.0277 | Ano1          |
| -3.39 | 0.005    | 0.309  | Tspan2        |
| -3.43 | 0.0118   | 0.4677 | Lipo2         |
| -3.45 | 4.05E-05 | 0.0209 | Selenbp2      |
| -3.45 | 0.0055   | 0.3253 | Fibin         |
| -3.47 | 2.80E-06 | 0.0082 | Ccdc109b      |
| -3.54 | 8.20E-05 | 0.0281 | Tspo          |
| -3.54 | 8.19E-06 | 0.01   | Cdon          |
| -3.57 | 0.0139   | 0.499  | Ptger3        |
| -3.57 | 0.0404   | 0.7409 | Pdgfrl        |
| -3.61 | 6.90E-05 | 0.025  | Spink2        |
| -3.61 | 8.23E-05 | 0.0281 | Nbl1          |
| -3.64 | 0.0211   | 0.5869 | Adamts16      |
| -3.65 | 0.0108   | 0.4473 | Aqp1          |
| -3.67 | 0.0254   | 0.6326 | Cdh13         |
| -3.68 | 0.0264   | 0.642  | Gm15378       |
| -3.69 | 7.05E-05 | 0.025  | Nrn1          |
| -3.73 | 0.0023   | 0.2001 | Ntn4          |
| -3.74 | 0.0002   | 0.0447 | Bmp4          |
| -3.81 | 0.0008   | 0.1032 | 1500015O10Rik |
| -3.86 | 0.0047   | 0.2956 | Crip1         |

|        |          |        |         |
|--------|----------|--------|---------|
| -3.87  | 9.71E-06 | 0.01   | Six1    |
| -4.08  | 0.0012   | 0.1388 | Prkd1   |
| -4.18  | 0.0277   | 0.6531 | Tmem100 |
| -4.25  | 0.0002   | 0.0416 | Ntrk3   |
| -4.45  | 0.0008   | 0.1106 | Nt5e    |
| -4.56  | 0.021    | 0.5846 | Ssc5d   |
| -4.61  | 0.0025   | 0.2083 | Garem   |
| -5.13  | 0.0008   | 0.1027 | Scara3  |
| -5.15  | 0.0058   | 0.338  | Rab37   |
| -5.15  | 0.0445   | 0.7623 | Matn2   |
| -5.18  | 0.0169   | 0.5383 | Igsf10  |
| -5.18  | 0.0096   | 0.4198 | Sema3c  |
| -5.19  | 0.0154   | 0.5185 | Plpp3   |
| -5.35  | 0.017    | 0.5408 | Lyve1   |
| -5.47  | 0.002    | 0.1863 | Sulf2   |
| -5.53  | 0.0432   | 0.7552 | Fgl2    |
| -5.57  | 0.0015   | 0.1594 | Dlx3    |
| -5.96  | 0.0137   | 0.4955 | Dkk3    |
| -6.02  | 0.0469   | 0.773  | Htra1   |
| -6.12  | 2.35E-05 | 0.014  | Kazald1 |
| -6.28  | 0.0079   | 0.3923 | Itih5   |
| -6.83  | 0.0025   | 0.2073 | Rgcc    |
| -6.98  | 0.0068   | 0.3668 | Hhip    |
| -7.37  | 0.0003   | 0.0516 | Dcx     |
| -7.72  | 0.0009   | 0.1184 | Ephx1   |
| -7.91  | 0.0012   | 0.1413 | Hbegf   |
| -8.72  | 1.65E-06 | 0.0058 | Angptl1 |
| -8.85  | 0.0002   | 0.0447 | Osr2    |
| -8.9   | 0.0214   | 0.5906 | Mir376c |
| -9.22  | 0.0025   | 0.207  | Stc1    |
| -9.56  | 0.0024   | 0.2062 | Mir677  |
| -9.87  | 3.45E-05 | 0.0187 | Gdf10   |
| -10.46 | 0.044    | 0.7601 | Anxa8   |
| -11.32 | 6.68E-05 | 0.0245 | Vit     |
| -12.76 | 9.00E-07 | 0.0045 | Ecm2    |
| -12.92 | 0.0029   | 0.2273 | Hoxd10  |
| -13.15 | 4.63E-07 | 0.0033 | Spon2   |

|         |          |        |                      |
|---------|----------|--------|----------------------|
| -17.18  | 1.44E-05 | 0.01   | Sema3d               |
| -20.05  | 0.0003   | 0.0493 | Casr                 |
| -20.1   | 1.19E-05 | 0.01   | Creb5; 9430076C15Rik |
| -22.17  | 0.0009   | 0.1161 | Sema3a               |
| -25.64  | 0.0007   | 0.1008 | Wif1                 |
| -26.34  | 1.52E-05 | 0.0102 | Calb2                |
| -30.43  | 0.0007   | 0.0965 | Egfl6                |
| -34.4   | 0.0002   | 0.0391 | Tspan15              |
| -37.95  | 9.12E-06 | 0.01   | Cilp                 |
| -59.86  | 0.0024   | 0.2035 | Clic5                |
| -137.39 | 0.0004   | 0.0676 | Thbs4                |
| -174.88 | 1.86E-06 | 0.0058 | Htra4                |
| -696.63 | 0.0005   | 0.0788 | Prg4                 |

1

2 **Table S5 Signaling pathways differentially expressed in the canal versus the periarticular region.**

| Pathway       | Gene              |                                                            | Fold Change  |
|---------------|-------------------|------------------------------------------------------------|--------------|
| <b>EGFR</b>   | <i>Btc</i>        | betacellulin                                               | -2.27        |
|               | <i>Cbl</i>        | Casitas B-lineage lymphoma                                 | 2.39         |
|               | <i>Cblb</i>       | Casitas B-lineage lymphoma b                               | 2.86         |
|               | <i>Ceacam1</i>    | carcinoembryonic antigen-related cell adhesion molecule 1  | 2.15         |
|               | <i>Dnm1</i>       | dynamamin 1                                                | -2.48        |
|               | <i>Hbegf</i>      | heparin-binding EGF-like growth factor                     | -7.91        |
|               | <i>Pak1</i>       | p21 protein (Cdc42/Rac)-activated kinase 1                 | 2.92         |
|               | <i>Pik3cb</i>     | phosphatidylinositol 3-kinase, catalytic, beta polypeptide | 2.53         |
|               | <i>Ptk2b</i>      | PTK2 protein tyrosine kinase 2 beta                        | 3.81         |
|               | <i>Ptpn6</i>      | protein tyrosine phosphatase, non-receptor type 6          | 2.25         |
|               | <i>Rgs16</i>      | regulator of G-protein signaling 16                        | 2.25         |
|               | <b>Semaphorin</b> | <i>Nrp1</i>                                                | neuropilin 1 |
| <i>Nrp2</i>   |                   | neuropilin 2                                               | 3.59         |
| <i>Plxdc1</i> |                   | plexin domain containing 1                                 | -2.03        |
| <i>Plxdc2</i> |                   | plexin domain containing 2                                 | -2.62        |

|                    |                 |                                                             |        |
|--------------------|-----------------|-------------------------------------------------------------|--------|
|                    | <i>Plxna2</i>   | plexin A2                                                   | 3.29   |
|                    | <i>Plxnd1</i>   | plexin D1                                                   | 10.8   |
|                    | <i>Sema3a</i>   | semaphorin 3A                                               | -22.17 |
|                    | <i>Sema3c</i>   | semaphorin 3C                                               | -5.18  |
|                    | <i>Sema3d</i>   | semaphorin 3D                                               | -17.18 |
|                    | <i>Sema3e</i>   | semaphorin 3E                                               | -3.09  |
|                    | <i>Sema5a</i>   | semaphorin 5A                                               | -2.02  |
|                    | <i>Sema6a</i>   | semaphorin 6A                                               | 2.27   |
|                    | <i>Sema6b</i>   | semaphorin 6B                                               | 2.35   |
|                    | <i>Sema7a</i>   | semaphorin 7A                                               | 7.91   |
| <b>TGFβ</b>        | <i>Bmp4</i>     | bone morphogenetic protein 4                                | -3.74  |
|                    | <i>Lef1</i>     | lymphoid enhancer binding factor 1                          | 2.08   |
|                    | <i>Runx2</i>    | runt related transcription factor 2                         | 2.06   |
|                    | <i>Serpine1</i> | serine (or cysteine) peptidase inhibitor, clade E, member 1 | 2.97   |
|                    | <i>Spp1</i>     | secreted phosphoprotein 1                                   | 58.6   |
|                    | <i>Tgfb1</i>    | transforming growth factor, beta 1                          | 2.99   |
|                    | <i>Tgfb1</i>    | transforming growth factor, beta receptor I                 | 2.39   |
|                    | <i>Tgfb3</i>    | transforming growth factor, beta receptor III               | -2.11  |
| <b>Wnt</b>         | <i>Arrb2</i>    | arrestin, beta 2                                            | 2.13   |
|                    | <i>Ccnd1</i>    | cyclin D1                                                   | 2.37   |
|                    | <i>Dkk3</i>     | dickkopf homolog 3                                          | -5.96  |
|                    | <i>Fzd4</i>     | frizzled homolog 4                                          | 3.87   |
|                    | <i>Fzd8</i>     | frizzled homolog 8                                          | -2.74  |
|                    | <i>Lef1</i>     | lymphoid enhancer binding factor 1                          | 2.08   |
|                    | <i>Mapk8ip1</i> | mitogen-activated protein kinase 8 interacting protein 1    | -2.01  |
|                    | <i>Prkd1</i>    | protein kinase D1                                           | -4.08  |
|                    | <i>Runx2</i>    | runt related transcription factor 2                         | 2.06   |
|                    | <i>Wif1</i>     | Wnt inhibitory factor 1                                     | -25.64 |
|                    | <i>Wisp2</i>    | WNT1 inducible signaling pathway protein 2                  | 2.89   |
| <b>Delta/Notch</b> | <i>Dtx4</i>     | deltex 4 homolog                                            | 2.64   |
|                    | <i>Hey1</i>     | hairy/enhancer-of-split related with YRPW motif 1           | 3.48   |
|                    | <i>Jag1</i>     | jagged 1                                                    | 3.95   |
|                    | <i>Lef1</i>     | lymphoid enhancer binding factor 1                          | 2.08   |
|                    | <i>Notch3</i>   | notch 3                                                     | 2.36   |
|                    | <i>Pak1</i>     | p21 protein (Cdc42/Rac)-activated kinase 1                  | 2.92   |



1

2 Graphical Abstract **Schematic of SOC canal formation.** SOC development is initiated by invasion of  
 3 periarticular, multipotent mesenchymal progenitors from discrete sites along the epiphyseal surface into  
 4 the underlying cartilage (i). At the time of SOC initiation, these periarticular cells, but not surrounding  
 5 chondrocytes, express VEGF, important for recruiting individual endothelial cells (vasculogenesis) and  
 6 existing vessels (angiogenesis) from the surrounding vasculature (ii). Invasion of the SOC canal is  
 7 associated with extensive proliferation within the canal, degradation of chondrocyte matrix and  
 8 chondrocyte apoptosis. Transition from canal invasion to expansion is associated with a redistribution of  
 9 VEGF expression, from cells within the canal and along the leading edge, to surrounding hypertrophic  
 10 chondrocytes (iii). This transition is associated with a transformation from periarticular cell-led invasion  
 11 to blood vessel-led SOC expansion. SOC expansion continues, eventually giving rise to the epiphyseal  
 12 marrow cavity (iv). Mesenchymal lineage cells (ie. osteoblasts, osteocytes, perivascular cells, etc.) within  
 13 the epiphyseal region are derive from periarticular progenitor cells present within the invading SOC canal.

### Graphical Abstract

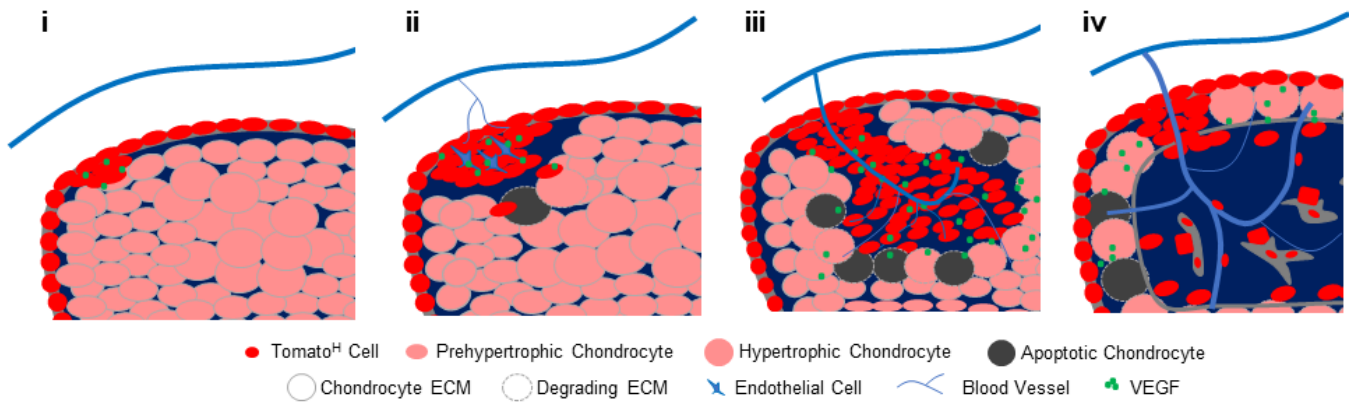

14
